# Supplementary material for: EGFR in enterocytes & endothelium and HIF1α in enterocytes are dispensable for massive small bowel resection induced angiogenesis
Source: PubMed Central journal article supplement (PMC7491746; doi:10.1371/journal.pone.0236964), 2020-09-15

Figure 7C

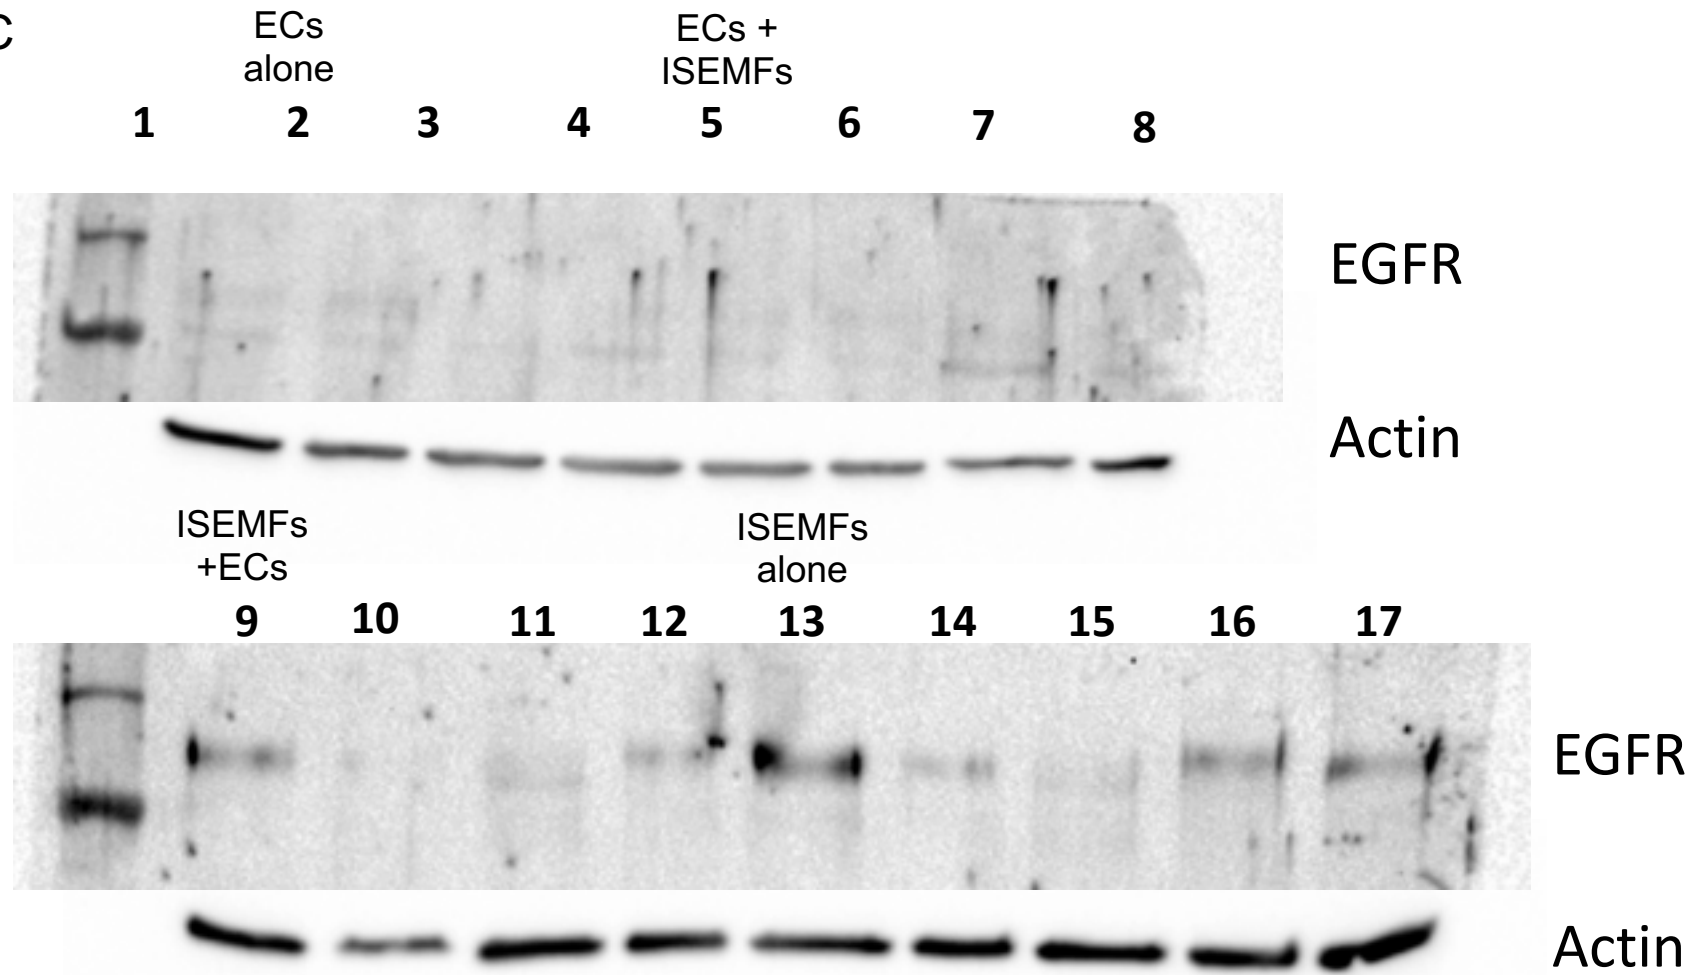

Figure 7D

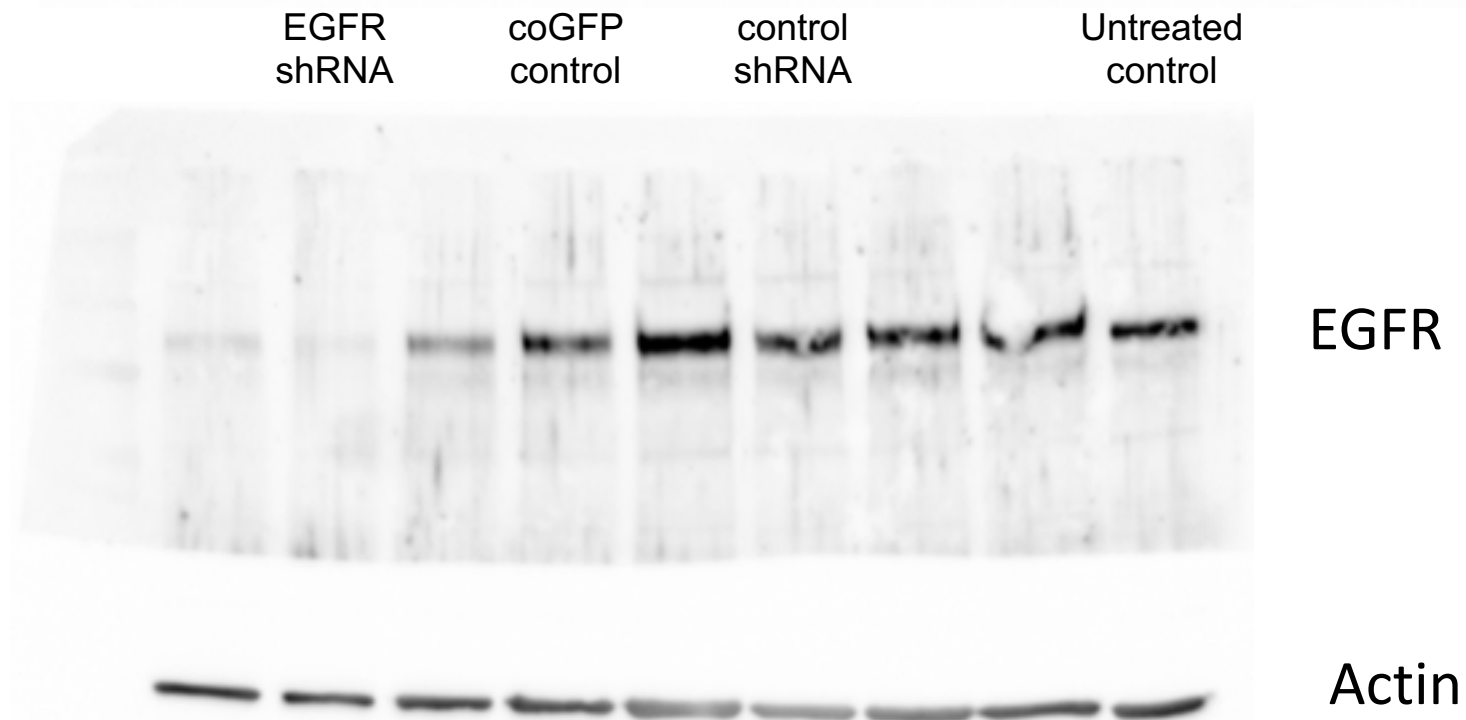

Supplement: pone.0236964.s001.pdf [file pone.0236964.s001.pdf]
